# Supplementary material for: Evaluating the effectiveness of rapid SARS-CoV-2 genome sequencing in supporting infection control teams: the COG-UK hospital-onset COVID-19 infection study
Source: bioRxiv or medRxiv preprint supplement (doi:10.1101/2022.02.10.22270799), 2022-02-13
Supplement: Supplementary file [file media-1.pdf]

## List of COG-UK HOCl Investigators

### Barts site

| Name of individual                  | Employing Institution        |
|-------------------------------------|------------------------------|
| <b>Teresa Cutino-Moguel</b>         | <b>Barts Heath NHS Trust</b> |
| Tabassum Khan                       | Barts Heath NHS Trust        |
| Beatrix Kele                        | Barts Heath NHS Trust        |
| Raghavendran<br>Kulasegaran-Shylini | Barts Heath NHS Trust        |
| Claire E. Broad                     | Barts Heath NHS Trust        |
| Dola Owoyemi                        | Barts Heath NHS Trust        |
| David Harrington                    | Barts Heath NHS Trust        |
| Clare Coffey                        | Barts Heath NHS Trust        |
| Martina Cummins                     | Barts Heath NHS Trust        |
| Anna Riddell                        | Barts Heath NHS Trust        |
| Tyrra D'Souza                       | Barts Heath NHS Trust        |

### Glasgow site

| Name of individual  | Employing Institution                                                                        |
|---------------------|----------------------------------------------------------------------------------------------|
| Guy Mollett         | MRC-University of Glasgow Centre for Virus Research                                          |
| <b>Emma Thomson</b> | <b>MRC-University of Glasgow Centre for Virus Research and NHS Greater Glasgow and Clyde</b> |
| Christine Peters    | NHS Greater Glasgow and Clyde                                                                |
| Aleks Marek         | NHS Greater Glasgow and Clyde                                                                |
| Rory Gunson         | NHS Greater Glasgow and Clyde                                                                |
| Emily Goldstein     | NHS Greater Glasgow and Clyde                                                                |
| Emilie Shepherd     | NHS Greater Glasgow and Clyde                                                                |
| James Shepherd      | MRC-University of Glasgow Centre for Virus Research                                          |
| David Robertson     | MRC-University of Glasgow Centre for Virus Research                                          |
| Katherine Smollett  | MRC-University of Glasgow Centre for Virus Research                                          |
| Ana da Silva Filipe | MRC-University of Glasgow Centre for Virus Research                                          |
| Alice Broos         | MRC-University of Glasgow Centre for Virus Research                                          |
| Stephen Carmichael  | MRC-University of Glasgow Centre for Virus Research                                          |
| Nicholas Suarez     | MRC-University of Glasgow Centre for Virus Research                                          |
| Chris Davis         | MRC-University of Glasgow Centre for Virus Research                                          |

|                      |                                                     |
|----------------------|-----------------------------------------------------|
| Sreenu Vattipally    | MRC-University of Glasgow Centre for Virus Research |
| Joseph Hughes        | MRC-University of Glasgow Centre for Virus Research |
| Ioulia Tsatsani      | MRC-University of Glasgow Centre for Virus Research |
| Jacqueline McTaggart | NHS Greater Glasgow and Clyde                       |
| Stephanie McEnhill   | NHS Greater Glasgow and Clyde                       |

### Guy's and St Thomas' site

| Name of individual    | Employing Institution |
|-----------------------|-----------------------|
| Adela Medina          | Viapath               |
| Themoula Charalampous | KCL                   |
| Bindi Patel           | GSTT NHS Trust        |
| Flavia Flaviani       | GSTT NHS Trust        |
| Jörg Saßmannshausen   | GSTT NHS Trust        |
| May Rabuya            | GSTT NHS Trust        |
| Sulekha Gurung        | GSTT NHS Trust        |
| Anu Augustine         | GSTT NHS Trust        |
| Rahul Batra           | GSTT NHS Trust        |
| Luke Snell            | GSTT NHS Trust        |
| <b>Gaia Nebbia</b>    | <b>GSTT NHS Trust</b> |

### Imperial site

| Name of individual    | Employing Institution                |
|-----------------------|--------------------------------------|
| <b>Alison Holmes</b>  | <b>Imperial Healthcare NHS Trust</b> |
| Sid Mookerjee         | Imperial Healthcare NHS Trust        |
| James Price           | Imperial Healthcare NHS Trust        |
| Paul Randell          | Imperial Healthcare NHS Trust        |
| Krystal Johnson       | Imperial Healthcare NHS Trust        |
| Thilipan Thaventhiran | Imperial Healthcare NHS Trust        |
| Damien Mine           | Imperial Healthcare NHS Trust        |
| Sophie Hunter         | Imperial Healthcare NHS Trust        |
| Isa Ahmad             | Imperial Healthcare NHS Trust        |
| Anitha Ramanathan     | Imperial Healthcare NHS Trust        |

### Liverpool site

| Name of individual | Employing Institution                 |
|--------------------|---------------------------------------|
| <b>Anu Chawla</b>  | <b>Liverpool NHS Foundation Trust</b> |
| Alistair Darby     | University of Liverpool               |
| Sam Haldenby       | University of Liverpool               |

|                    |                                |
|--------------------|--------------------------------|
| Mark Whitehead     | University of Liverpool        |
| Claudia Wierzbicki | University of Liverpool        |
| Hermione Webster   | University of Liverpool        |
| Amy Colleran       | University of Liverpool        |
| Flora Todd         | University of Liverpool        |
| Hannah Trivett     | University of Liverpool        |
| Anita Lucaci       | University of Liverpool        |
| Becky Taylor       | Liverpool NHS Foundation Trust |
| Keith Morris       | Liverpool NHS Foundation Trust |
| Charles Numbere    | Liverpool NHS Foundation Trust |
| Mark Hopkins       | Liverpool NHS Foundation Trust |
| Jenifer Mason      | Liverpool NHS Foundation Trust |
| Alexandra Bailey   | Liverpool NHS Foundation Trust |
| Debbie Lankstead   | Liverpool NHS Foundation Trust |
| Damian Burns       | Liverpool NHS Foundation Trust |

#### Manchester site

| Name of individual     | Employing Institution                                     |
|------------------------|-----------------------------------------------------------|
| <b>Nicholas Machin</b> | <b>PHE and Manchester University NHS Foundation Trust</b> |
| Shazaad Ahmad          | Manchester University NHS Foundation Trust                |
| Julie Cawthorne        | Manchester University NHS Foundation Trust                |
| Ryan George            | Manchester University NHS Foundation Trust                |
| James Montgomery       | Manchester University NHS Foundation Trust                |
| Deborah McKew          | Manchester University NHS Foundation Trust                |
| Osama Abdul-Wahab      | PHE                                                       |
| Thomas El-Basha        | PHE                                                       |
| James Barnes           | PHE                                                       |
| Ian Venables           | Manchester University NHS Foundation Trust                |
| Katharine Wylie        | Manchester University NHS Foundation Trust                |
| Karen Talbot           | Manchester University NHS Foundation Trust                |

#### Newcastle site

| Name of individual | Employing Institution      |
|--------------------|----------------------------|
| <b>Yusri Taha</b>  | <b>Newcastle NHS Trust</b> |
| Angela Cobb        | Newcastle NHS Trust        |

|                         |                        |
|-------------------------|------------------------|
| Michelle Ramsay         | Newcastle NHS Trust    |
| Maria Leader            | Newcastle NHS Trust    |
| Shirelle Burton-Fanning | Newcastle NHS Trust    |
| Julie Samuel            | Newcastle NHS Trust    |
| Milo Cullinan           | Newcastle NHS Trust    |
| Sarah Francis           | Newcastle NHS Trust    |
| Lydia Taylor            | Newcastle NHS Trust    |
| Darren Smith            | Northumbria University |
| Matthew Bashton         | Northumbria University |
| Matthew Crown           | Northumbria University |
| Andrew Nelson           | Northumbria University |
| Clare McCann            | Northumbria University |
| Gregory Young           | Northumbria University |
| Will Stanley            | Northumbria University |
| Zack Richards           | Northumbria University |
| Rui Dos Santos          | Northumbria University |

#### Nottingham site

| Name of individual   | Employing Institution       |
|----------------------|-----------------------------|
| <b>Nikunj Mahida</b> | <b>Nottingham NHS Trust</b> |
| William Irving       | Nottingham NHS Trust        |
| Matthew Loose        | University of Nottingham    |
| Patrick McClure      | University of Nottingham    |
| Mitch Clarke         | Nottingham NHS Trust        |
| Elaine Baxter        | Nottingham NHS Trust        |
| Carl Yates           | Nottingham NHS Trust        |
| Irfan Aslam          | Nottingham NHS Trust        |
| Vicki Fleming        | Nottingham NHS Trust        |
| Michelle Lister      | Nottingham NHS Trust        |
| Johnny Debebe        | University of Nottingham    |
| Nadine Holmes        | University of Nottingham    |
| Christopher Moore    | University of Nottingham    |
| Matt Carlile         | University of Nottingham    |

#### Royal Free site

| Name of individual | Employing Institution |
|--------------------|-----------------------|
|--------------------|-----------------------|

|                        |                                    |
|------------------------|------------------------------------|
| <b>Tabitha Mahungu</b> | <b>Royal Free London NHS Trust</b> |
| Sophie Weller          | Royal Free London NHS Trust        |
| Tanzina Haque          | Royal Free London NHS Trust        |
| Jennifer Hart          | Royal Free London NHS Trust        |
| Dianne Irish-Tavares   | Royal Free London NHS Trust        |
| Eric Witele            | Royal Free London NHS Trust        |
| Mia De Mesa            | Royal Free London NHS Trust        |
| Vicky Pang             | Royal Free London NHS Trust        |
| Jelena Heaphy          | Royal Free London NHS Trust        |
| Wendy Chatterton       | Health Services Laboratory         |
| Monika Pusok           | Health Services Laboratory         |

### Sandwell site

| <b>Name of individual</b> | <b>Employing Institution</b>                              |
|---------------------------|-----------------------------------------------------------|
| <b>Dr Tranprit Saluja</b> | <b>Sandwell &amp; West Birmingham Hospitals NHS Trust</b> |
| Zahira Maqsood            | Sandwell NHS Trust                                        |
| Angie Williams            | Sandwell NHS Trust                                        |
| Debbie Devonport          | Sandwell NHS Trust                                        |
| Lucy Palinkas             | Sandwell NHS Trust                                        |
| Diane Thomlinson          | Sandwell NHS Trust                                        |
| Julie Booth               | Sandwell NHS Trust                                        |
| Ashok Dadrah              | Sandwell NHS Trust                                        |
| Amanda Symonds            | Sandwell NHS Trust                                        |
| Cassandra Craig           | Sandwell NHS Trust                                        |
| Dr Abhinav Kumar          | Sandwell NHS Trust                                        |

### Sheffield site

| <b>Name of individual</b> | <b>Employing Institution</b>   |
|---------------------------|--------------------------------|
| <b>Thushan de Silva</b>   | <b>University of Sheffield</b> |
| Matthew D Parker          | University of Sheffield        |
| Peijun Zhang              | University of Sheffield        |
| Max Whiteley              | University of Sheffield        |
| Benjamin B Lindsey        | University of Sheffield        |
| Paige Wolverson           | University of Sheffield        |
| Benjamin H Foulkes        | University of Sheffield        |
| Luke Green                | University of Sheffield        |
| Marta Gallis Ramalho      | University of Sheffield        |
| Stavroula F Louka         | University of Sheffield        |
| Adrienn Angyal            | University of Sheffield        |
| Nikki Smith               | University of Sheffield        |

|                     |                         |
|---------------------|-------------------------|
| David G Partridge   | Sheffield NHS Trust     |
| Cariad Evans        | Sheffield NHS Trust     |
| Mohammad Raza       | Sheffield NHS Trust     |
| Hayley Colton       | Sheffield NHS Trust     |
| Rebecca Gregory     | Sheffield NHS Trust     |
| Phillip Ravenscroft | Sheffield NHS Trust     |
| Katie Johnson       | Sheffield NHS Trust     |
| Sharon Hsu          | University of Sheffield |
| Alexander J Keeley  | Sheffield NHS Trust     |
| Alison Cope         | Sheffield NHS Trust     |
| Amy State           | Sheffield NHS Trust     |
| Nasar Ali           | Sheffield NHS Trust     |
| Rasha Raghei        | Sheffield NHS Trust     |
| Joe Heffer          | Sheffield NHS Trust     |
| Stella Christou     | University of Sheffield |
| Samantha E Hansford | University of Sheffield |
| Hailey R Hornsby    | University of Sheffield |
| Phil Wade           | Sheffield NHS Trust     |
| Kay Cawthron        | Sheffield NHS Trust     |
| Maqsood Khan        | Sheffield NHS Trust     |
| Amber Ford          | Sheffield NHS Trust     |
| Imogen Wilson       | Sheffield NHS Trust     |
| Kate Harrington     | Sheffield NHS Trust     |
| Nic Tinker          | Sheffield NHS Trust     |
| Sally Nyinza        | Sheffield NHS Trust     |

#### Southampton site

| Name of individual   | Employing Institution                                |
|----------------------|------------------------------------------------------|
| <b>Kordo Saeed</b>   | University Hospital Southampton NHS Foundation Trust |
| Jacqui Prieto        | University Hospital Southampton NHS Foundation Trust |
| Adhyana Mahanama     | University Hospital Southampton NHS Foundation Trust |
| Buddhini Samaraweera | University Hospital Southampton NHS Foundation Trust |
| Siona Silviera       | University Hospital Southampton NHS Foundation Trust |
| Emanuela Pelosi      | University Hospital Southampton NHS Foundation Trust |
| Eleri Wilson-Davies  | University Hospital Southampton NHS Foundation Trust |
| Sarah Jeremiah       | University Hospital Southampton NHS Foundation Trust |
| Helen Wheeler        | University Hospital Southampton NHS Foundation Trust |

|                   |                                                         |
|-------------------|---------------------------------------------------------|
| Matthew Harvey    | University Hospital Southampton<br>NHS Foundation Trust |
| Thea Sass         | University Hospital Southampton<br>NHS Foundation Trust |
| Helen Umpleby     | University Hospital Southampton<br>NHS Foundation Trust |
| Stephen Aplin     | University Hospital Southampton<br>NHS Foundation Trust |
| Samuel Robson     | University of Portsmouth                                |
| Sharon Glaysher   | Portsmouth Hospital NHS Trust                           |
| Scott Elliott     | Portsmouth Hospital NHS Trust                           |
| Kate Cook         | University of Portsmouth                                |
| Christopher Fearn | University of Portsmouth                                |
| Salman Goudarzi   | University of Portsmouth                                |
| Katie Loveson     | University of Portsmouth                                |
| Angela Beckett    | University of Portsmouth                                |

### St George's site

| Name of individual      | Employing Institution                           |
|-------------------------|-------------------------------------------------|
| Kenneth Laing           | St Georges, UoL                                 |
| Irene Monahan           | St Georges, UoL                                 |
| Adam Witney             | St Georges, UoL                                 |
| Joshua Taylor           | St Georges NHS Trust                            |
| NgeeKeong Tan           | St Georges NHS Trust                            |
| <b>Cassie Pope</b>      | <b>St Georges NHS Trust and St Georges, UoL</b> |
| Claudia Cardosa Pereira | St Georges NHS Trust                            |
| Vaz Malik               | St Georges, UoL                                 |

### UCLH site

| Name of individual   | Employing Institution |
|----------------------|-----------------------|
| <b>Gee Yen Shin</b>  | <b>UCLH NHS Trust</b> |
| Eleni Nastouli       | UCLH NHS Trust        |
| Catherine Houlihan   | UCLH NHS Trust        |
| Judith Heaney        | UCLH NHS Trust        |
| Matthew Byott        | UCLH NHS Trust        |
| Dan Frampton         | UCL / UCLH            |
| Gema Martinez-Garcia | UCLH NHS Trust        |
| Leila Hail           | UCLH NHS Trust        |
| Ndifreke Atang       | UCLH NHS Trust        |
| Helen Francis        | UCLH NHS Trust        |
| Milica Rajkov        | UCLH NHS Trust        |

### UCL Genomics

| Name of individual | Employing Institution |
|--------------------|-----------------------|
| Judith Breuer      | UCL                   |
| Rachel Williams    | UCL                   |
| Sunando Roy        | UCL                   |
| Charlotte Williams | UCL                   |
| Nadua Bayzid       | UCL                   |
| Marius Cotic       | UCL                   |

### UCL Comprehensive Clinical Trials Unit

| Name of individual | Employing Institution |
|--------------------|-----------------------|
| James Blackstone   | UCL                   |
| Leanne Hockey      | UCL                   |
| Alyson MacNeil     | UCL                   |
| Rachel McComish    | UCL                   |
| Monica Panca       | UCL                   |
| Georgia Marley     | UCL                   |

### UCL Institute for Global Health

| Name of individual | Employing Institution |
|--------------------|-----------------------|
| Andrew Copas       | UCL                   |
| Oliver Stirrup     | UCL                   |
| Fiona Mapp         | UCL                   |

### UCL Research IT Services

| Name of individual | Employing Institution |
|--------------------|-----------------------|
| Asif Tamuri        | UCL                   |
| Stefan Piatek      | UCL                   |

### University of Strathclyde

| Name of individual | Employing Institution |
|--------------------|-----------------------|
| Paul Flowers       | UoS                   |

### Francis Crick Institute

| Name of individual  | Employing Institution   |
|---------------------|-------------------------|
| Marg Crawford       | Francis Crick Institute |
| Laura Cubitt        | Francis Crick Institute |
| Deborah J Jackson   | Francis Crick Institute |
| Jimena Perez-Lloret | Francis Crick Institute |



|                  |                         |
|------------------|-------------------------|
| Sophie Ward      | Francis Crick Institute |
| Makis Fidanis    | Francis Crick Institute |
| Aaron Sait       | Francis Crick Institute |
| Robert Goldstone | Francis Crick Institute |
| Harshil Patel    | Francis Crick Institute |
| Chelsea Sawyer   | Francis Crick Institute |
| Aengus Stewart   | Francis Crick Institute |
| Steve Gamblin    | Francis Crick Institute |
| Charles Swanton  | Francis Crick Institute |
| Jerome Nicod     | Francis Crick Institute |
