# Supplementary material for: Evaluating the effectiveness of rapid SARS-CoV-2 genome sequencing in supporting infection control teams: the COG-UK hospital-onset COVID-19 infection study
Source: bioRxiv or medRxiv preprint supplement (doi:10.1101/2022.02.10.22270799), 2022-02-13
Supplement: Supplementary file [file media-2.pdf]

# The COVID-19 Genomics UK (COG-UK) consortium

June 2021 V.1

**Funding acquisition, Leadership and supervision, Metadata curation, Project administration, Samples and logistics, Sequencing and analysis, Software and analysis tools, and Visualisation:**  
Dr Samuel C Robson PhD <sup>13, 84</sup>

**Funding acquisition, Leadership and supervision, Metadata curation, Project administration, Samples and logistics, Sequencing and analysis, and Software and analysis tools:**  
Dr Thomas R Connor PhD <sup>11, 74</sup> and Prof Nicholas J Loman PhD <sup>43</sup>

**Leadership and supervision, Metadata curation, Project administration, Samples and logistics, Sequencing and analysis, Software and analysis tools, and Visualisation:**  
Dr Tanya Golubchik PhD <sup>5</sup>

**Funding acquisition, Leadership and supervision, Metadata curation, Samples and logistics, Sequencing and analysis, and Visualisation:**  
Dr Rocio T Martinez Nunez PhD <sup>46</sup>

**Funding acquisition, Leadership and supervision, Project administration, Samples and logistics, Sequencing and analysis, and Software and analysis tools:**  
Dr David Bonsall PhD <sup>5</sup>

**Funding acquisition, Leadership and supervision, Project administration, Sequencing and analysis, Software and analysis tools, and Visualisation:**  
Prof Andrew Rambaut DPhil <sup>104</sup>

**Funding acquisition, Metadata curation, Project administration, Samples and logistics, Sequencing and analysis, and Software and analysis tools:**  
Dr Luke B Snell MSc, MBBS <sup>12</sup>

**Leadership and supervision, Metadata curation, Project administration, Samples and logistics, Software and analysis tools, and Visualisation:**  
Rich Livett MSc <sup>116</sup>

**Funding acquisition, Leadership and supervision, Metadata curation, Project administration, and Samples and logistics:**  
Dr Catherine Ludden PhD <sup>20, 70</sup>

**Funding acquisition, Leadership and supervision, Metadata curation, Samples and logistics, and Sequencing and analysis:**  
Dr Sally Corden PhD <sup>74</sup> and Dr Eleni Nastouli FRCPATH <sup>96, 95, 30</sup>

**Funding acquisition, Leadership and supervision, Metadata curation, Sequencing and analysis, and Software and analysis tools:**  
Dr Gaia Nebbia PhD, FRCPATH <sup>12</sup>

**Funding acquisition, Leadership and supervision, Project administration, Samples and logistics, and Sequencing and analysis:**  
Ian Johnston BSc <sup>116</sup>

**Leadership and supervision, Metadata curation, Project administration, Samples and logistics, and Sequencing and analysis:**

Prof Katrina Lythgoe PhD <sup>5</sup>, Dr M. Estee Torok FRCP <sup>19, 20</sup> and Prof Ian G Goodfellow PhD <sup>24</sup>

**Leadership and supervision, Metadata curation, Project administration, Samples and logistics, and Visualisation:**

Dr Jacqui A Prieto PhD <sup>97, 82</sup> and Dr Kordo Saeed MD, FRCPath <sup>97, 83</sup>

**Leadership and supervision, Metadata curation, Project administration, Sequencing and analysis, and Software and analysis tools:**

Dr David K Jackson PhD <sup>116</sup>

**Leadership and supervision, Metadata curation, Samples and logistics, Sequencing and analysis, and Visualisation:**

Dr Catherine Houlihan PhD <sup>96, 94</sup>

**Leadership and supervision, Metadata curation, Sequencing and analysis, Software and analysis tools, and Visualisation:**

Dr Dan Frampton PhD <sup>94, 95</sup>

**Metadata curation, Project administration, Samples and logistics, Sequencing and analysis, and Software and analysis tools:**

Dr William L Hamilton PhD <sup>19</sup> and Dr Adam A Witney PhD <sup>41</sup>

**Funding acquisition, Samples and logistics, Sequencing and analysis, and Visualisation:**

Dr Giselda Bucca PhD <sup>101</sup>

**Funding acquisition, Leadership and supervision, Metadata curation, and Project administration:**

Dr Cassie F Pope PhD <sup>40, 41</sup>

**Funding acquisition, Leadership and supervision, Metadata curation, and Samples and logistics:**

Dr Catherine Moore PhD <sup>74</sup>

**Funding acquisition, Leadership and supervision, Metadata curation, and Sequencing and analysis:**

Prof Emma C Thomson PhD, FRCP <sup>53</sup>

**Funding acquisition, Leadership and supervision, Project administration, and Samples and logistics:**

Dr Ewan M Harrison PhD <sup>116, 102</sup>

**Funding acquisition, Leadership and supervision, Sequencing and analysis, and Visualisation:**

Prof Colin P Smith PhD <sup>101</sup>

**Leadership and supervision, Metadata curation, Project administration, and Sequencing and analysis:**

Fiona Rogan BSc <sup>77</sup>

**Leadership and supervision, Metadata curation, Project administration, and Samples and logistics:**

Shaun M Beckwith MSc <sup>6</sup>, Abigail Murray Degree <sup>6</sup>, Dawn Singleton HNC <sup>6</sup>, Dr Kirstine Eastick PhD, FRCPath <sup>37</sup>, Dr Liz A Sheridan PhD <sup>98</sup>, Paul Randell MSc, PgD <sup>99</sup>, Dr Leigh M Jackson PhD <sup>105</sup>, Dr Cristina V Ariani PhD <sup>116</sup> and Dr Sónia Gonçalves PhD <sup>116</sup>

**Leadership and supervision, Metadata curation, Samples and logistics, and Sequencing and analysis:**

Dr Derek J Fairley PhD <sup>3, 77</sup>, Prof Matthew W Loose PhD <sup>18</sup> and Joanne Watkins MSc <sup>74</sup>

**Leadership and supervision, Metadata curation, Samples and logistics, and Visualisation:**

Dr Samuel Moses MD <sup>25, 106</sup>

**Leadership and supervision, Metadata curation, Sequencing and analysis, and Software and analysis tools:**

Dr Sam Nicholls PhD <sup>43</sup>, Dr Matthew Bull PhD <sup>74</sup> and Dr Roberto Amato PhD <sup>116</sup>

**Leadership and supervision, Project administration, Samples and logistics, and Sequencing and analysis:**

Prof Darren L Smith PhD <sup>36, 65, 66</sup>

**Leadership and supervision, Sequencing and analysis, Software and analysis tools, and Visualisation:**

Prof David M Aanensen PhD <sup>14, 116</sup> and Dr Jeffrey C Barrett PhD <sup>116</sup>

**Metadata curation, Project administration, Samples and logistics, and Sequencing and analysis:**

Dr Dinesh Aggarwal MRCP<sup>20, 116, 70</sup>, Dr James G Shepherd MBCHB, MRCP <sup>53</sup>, Dr Martin D Curran PhD <sup>71</sup> and Dr Surendra Parmar PhD <sup>71</sup>

**Metadata curation, Project administration, Sequencing and analysis, and Software and analysis tools:**

Dr Matthew D Parker PhD <sup>109</sup>

**Metadata curation, Samples and logistics, Sequencing and analysis, and Software and analysis tools:**

Dr Catryn Williams PhD <sup>74</sup>

**Metadata curation, Samples and logistics, Sequencing and analysis, and Visualisation:**

Dr Sharon Glaysher PhD <sup>68</sup>

**Metadata curation, Sequencing and analysis, Software and analysis tools, and Visualisation:**

Dr Anthony P Underwood PhD <sup>14, 116</sup>, Dr Matthew Bashton PhD <sup>36, 65</sup>, Dr Nicole Pacchiarini PhD <sup>74</sup>, Dr Katie F Loveson PhD <sup>84</sup> and Matthew Byott MSc <sup>95, 96</sup>

**Project administration, Sequencing and analysis, Software and analysis tools, and Visualisation:**

Dr Alessandro M Carabelli PhD <sup>20</sup>

**Funding acquisition, Leadership and supervision, and Metadata curation:**

Dr Kate E Templeton PhD <sup>56, 104</sup>

**Funding acquisition, Leadership and supervision, and Project administration:**

Dr Thushan I de Silva PhD <sup>109</sup>, Dr Dennis Wang PhD <sup>109</sup>, Dr Cordelia F Langford PhD <sup>116</sup> and John Sillitoe BEng <sup>116</sup>

**Funding acquisition, Leadership and supervision, and Samples and logistics:**

Prof Rory N Gunson PhD, FRCPath <sup>55</sup>

**Funding acquisition, Leadership and supervision, and Sequencing and analysis:**

Dr Simon Cottrell PhD <sup>74</sup>, Dr Justin O'Grady PhD <sup>75, 103</sup> and Prof Dominic Kwiatkowski PhD <sup>116, 108</sup>

**Leadership and supervision, Metadata curation, and Project administration:**

Dr Patrick J Lillie PhD, FRCP<sup>37</sup>

**Leadership and supervision, Metadata curation, and Samples and logistics:**

Dr Nicholas Cortes MBCHB<sup>33</sup>, Dr Nathan Moore MBCHB<sup>33</sup>, Dr Claire Thomas DPhil<sup>33</sup>, Phillipa J Burns MSc, DipRCPATH<sup>37</sup>, Dr Tabitha W Mahungu FRCPATH<sup>80</sup> and Steven Liggett BSc<sup>86</sup>

**Leadership and supervision, Metadata curation, and Sequencing and analysis:**

Angela H Beckett MSc<sup>13, 81</sup> and Prof Matthew TG Holden PhD<sup>73</sup>

**Leadership and supervision, Project administration, and Samples and logistics:**

Dr Lisa J Levett PhD<sup>34</sup>, Dr Husam Osman PhD<sup>70, 35</sup> and Dr Mohammed O Hassan-Ibrahim PhD, FRCPATH<sup>99</sup>

**Leadership and supervision, Project administration, and Sequencing and analysis:**

Dr David A Simpson PhD<sup>77</sup>

**Leadership and supervision, Samples and logistics, and Sequencing and analysis:**

Dr Meera Chand PhD<sup>72</sup>, Prof Ravi K Gupta PhD<sup>102</sup>, Prof Alistair C Darby PhD<sup>107</sup> and Prof Steve Paterson PhD<sup>107</sup>

**Leadership and supervision, Sequencing and analysis, and Software and analysis tools:**

Prof Oliver G Pybus DPhil<sup>23</sup>, Dr Erik M Volz PhD<sup>39</sup>, Prof Daniela de Angelis PhD<sup>52</sup>, Prof David L Robertson PhD<sup>53</sup>, Dr Andrew J Page PhD<sup>75</sup> and Dr Inigo Martincorena PhD<sup>116</sup>

**Leadership and supervision, Sequencing and analysis, and Visualisation:**

Dr Louise Aigrain PhD<sup>116</sup> and Dr Andrew R Bassett PhD<sup>116</sup>

**Metadata curation, Project administration, and Samples and logistics:**

Dr Nick Wong DPhil, MRCP, FRCPATH<sup>50</sup>, Dr Yusri Taha MD, PhD<sup>89</sup>, Michelle J Erkiert BA<sup>99</sup> and Dr Michael H Spencer Chapman MBBS<sup>116, 102</sup>

**Metadata curation, Project administration, and Sequencing and analysis:**

Dr Rebecca Dewar PhD<sup>56</sup> and Martin P McHugh MSc<sup>56, 111</sup>

**Metadata curation, Project administration, and Software and analysis tools:**

Siddharth Mookerjee MPH<sup>38, 57</sup>

**Metadata curation, Project administration, and Visualisation:**

Stephen Aplin<sup>97</sup>, Matthew Harvey<sup>97</sup>, Thea Sass<sup>97</sup>, Dr Helen Umpleby FRCP<sup>97</sup> and Helen Wheeler<sup>97</sup>

**Metadata curation, Samples and logistics, and Sequencing and analysis:**

Dr James P McKenna PhD<sup>3</sup>, Dr Ben Warne MRCP<sup>9</sup>, Joshua F Taylor MSc<sup>22</sup>, Yasmin Chaudhry BSc<sup>24</sup>, Rhys Izuagbe<sup>24</sup>, Dr Aminu S Jahun PhD<sup>24</sup>, Dr Gregory R Young PhD<sup>36, 65</sup>, Dr Claire McMurray PhD<sup>43</sup>, Dr Clare M McCann PhD<sup>65, 66</sup>, Dr Andrew Nelson PhD<sup>65, 66</sup> and Scott Elliott<sup>68</sup>

**Metadata curation, Samples and logistics, and Visualisation:**

Hannah Lowe MSc<sup>25</sup>

**Metadata curation, Sequencing and analysis, and Software and analysis tools:**

Dr Anna Price PhD <sup>11</sup>, Matthew R Crown BSc <sup>65</sup>, Dr Sara Rey PhD <sup>74</sup>, Dr Sunando Roy PhD <sup>96</sup> and Dr Ben Temperton PhD <sup>105</sup>

**Metadata curation, Sequencing and analysis, and Visualisation:**

Dr Sharif Shaaban PhD <sup>73</sup> and Dr Andrew R Hesketh PhD <sup>101</sup>

**Project administration, Samples and logistics, and Sequencing and analysis:**

Dr Kenneth G Laing PhD<sup>41</sup>, Dr Irene M Monahan PhD <sup>41</sup> and Dr Judith Heaney PhD <sup>95, 96, 34</sup>

**Project administration, Samples and logistics, and Visualisation:**

Dr Emanuela Pelosi FRCPATH <sup>97</sup>, Siona Silveira MSc <sup>97</sup> and Dr Eleri Wilson-Davies MD, FRCPATH <sup>97</sup>

**Samples and logistics, Software and analysis tools, and Visualisation:**

Dr Helen Fryer PhD <sup>5</sup>

**Sequencing and analysis, Software and analysis tools, and Visualization:**

Dr Helen Adams PhD <sup>4</sup>, Dr Louis du Plessis PhD <sup>23</sup>, Dr Rob Johnson PhD <sup>39</sup>, Dr William T Harvey PhD <sup>53, 42</sup>, Dr Joseph Hughes PhD <sup>53</sup>, Dr Richard J Orton PhD <sup>53</sup>, Dr Lewis G Spurgin PhD <sup>59</sup>, Dr Yann Bourgeois PhD <sup>81</sup>, Dr Chris Ruis PhD <sup>102</sup>, Áine O'Toole MSc <sup>104</sup>, Marina Gourtovaia MSc <sup>116</sup> and Dr Theo Sanderson PhD <sup>116</sup>

**Funding acquisition, and Leadership and supervision:**

Dr Christophe Fraser PhD <sup>5</sup>, Dr Jonathan Edgeworth PhD, FRCPATH <sup>12</sup>, Prof Judith Breuer MD <sup>96, 29</sup>, Dr Stephen L Michell PhD <sup>105</sup> and Prof John A Todd PhD <sup>115</sup>

**Funding acquisition, and Project administration:**

Michaela John BSc <sup>10</sup> and Dr David Buck PhD <sup>115</sup>

**Leadership and supervision, and Metadata curation:**

Dr Kavitha Gajee MBBS, FRCPATH <sup>37</sup> and Dr Gemma L Kay PhD <sup>75</sup>

**Leadership and supervision, and Project administration:**

Prof Sharon J Peacock PhD <sup>20, 70</sup> and David Heyburn <sup>74</sup>

**Leadership and supervision, and Samples and logistics:**

Katie Kitchman BSc <sup>37</sup>, Prof Alan McNally PhD <sup>43, 93</sup>, David T Pritchard MSc, CSci <sup>50</sup>, Dr Samir Dervisevic FRCPATH <sup>58</sup>, Dr Peter Muir PhD <sup>70</sup>, Dr Esther Robinson PhD <sup>70, 35</sup>, Dr Barry B Vipond PhD <sup>70</sup>, Newara A Ramadan MSc, CSci, FIBMS <sup>78</sup>, Dr Christopher Jeanes MBBS <sup>90</sup>, Danni Weldon BSc <sup>116</sup>, Jana Catalan MSc <sup>118</sup> and Neil Jones MSc <sup>118</sup>

**Leadership and supervision, and Sequencing and analysis:**

Dr Ana da Silva Filipe PhD <sup>53</sup>, Dr Chris Williams MBBS <sup>74</sup>, Marc Fuchs BSc <sup>77</sup>, Dr Julia Miskelly PhD <sup>77</sup>, Dr Aaron R Jeffries PhD <sup>105</sup>, Karen Oliver BSc <sup>116</sup> and Dr Naomi R Park PhD <sup>116</sup>

**Metadata curation, and Samples and logistics:**

Amy Ash BSc <sup>1</sup>, Cherian Koshy MSc, CSci, FIBMS <sup>1</sup>, Magdalena Barrow <sup>7</sup>, Dr Sarah L Buchan PhD <sup>7</sup>, Dr Anna Mantzouratou PhD <sup>7</sup>, Dr Gemma Clark PhD <sup>15</sup>, Dr Christopher W Holmes PhD <sup>16</sup>, Sharon Campbell MSc <sup>17</sup>, Thomas Davis MSc <sup>21</sup>, Ngee Keong Tan MSc <sup>22</sup>, Dr Julianne R Brown PhD <sup>29</sup>, Dr Kathryn A Harris PhD <sup>29, 2</sup>, Stephen P Kidd MSc <sup>33</sup>, Dr Paul R Grant PhD <sup>34</sup>, Dr Li Xu-McCrae PhD <sup>35</sup>, Dr Alison Cox PhD <sup>38, 63</sup>, Pinglawathee Madona <sup>38, 63</sup>, Dr Marcus Pond PhD <sup>38, 63</sup>, Dr Paul A Randell MBBS <sup>38, 63</sup>, Karen T Withell FIBMS <sup>48</sup>, Cheryl Williams MSc <sup>51</sup>, Dr Clive Graham MD <sup>60</sup>, Rebecca Denton-Smith

BSc<sup>62</sup>, Emma Swindells BSc<sup>62</sup>, Robyn Turnbull BSc<sup>62</sup>, Dr Tim J Sloan PhD<sup>67</sup>, Dr Andrew Bosworth PhD<sup>70,35</sup>, Stephanie Hutchings<sup>70</sup>, Hannah M Pymont MSc<sup>70</sup>, Dr Anna Casey PhD<sup>76</sup>, Dr Liz Ratcliffe PhD<sup>76</sup>, Dr Christopher R Jones PhD<sup>79,105</sup>, Dr Bridget A Knight PhD<sup>79,105</sup>, Dr Tanzina Haque PhD, FRCPath<sup>80</sup>, Dr Jennifer Hart MRCP<sup>80</sup>, Dr Dianne Irish-Tavares FRCPath<sup>80</sup>, Eric Witele MSc<sup>80</sup>, Craig Mower BA<sup>86</sup>, Louisa K Watson DipHE<sup>86</sup>, Jennifer Collins BSc<sup>89</sup>, Gary Eltringham BSc<sup>89</sup>, Dorian Crudgington<sup>98</sup>, Ben Macklin<sup>98</sup>, Prof Miren Iturriza-Gomara PhD<sup>107</sup>, Dr Anita O Lucaci PhD<sup>107</sup> and Dr Patrick C McClure PhD<sup>113</sup>

#### **Metadata curation, and Sequencing and analysis:**

Matthew Carlile BSc<sup>18</sup>, Dr Nadine Holmes PhD<sup>18</sup>, Dr Christopher Moore PhD<sup>18</sup>, Dr Nathaniel Storey PhD<sup>29</sup>, Dr Stefan Rooke PhD<sup>73</sup>, Dr Gonzalo Yebra PhD<sup>73</sup>, Dr Noel Craine DPhil<sup>74</sup>, Malorie Perry MSc<sup>74</sup>, Dr Nabil-Fareed Alikhan PhD<sup>75</sup>, Dr Stephen Bridgett PhD<sup>77</sup>, Kate F Cook MScR<sup>84</sup>, Christopher Fearn MSc<sup>84</sup>, Dr Salman Goudarzi PhD<sup>84</sup>, Prof Ronan A Lyons MD<sup>88</sup>, Dr Thomas Williams MD<sup>104</sup>, Dr Sam T Haldenby PhD<sup>107</sup>, Jillian Durham BSc<sup>116</sup> and Dr Steven Leonard PhD<sup>116</sup>

#### **Metadata curation, and Software and analysis tools:**

Robert M Davies MA (Cantab)<sup>116</sup>

#### **Project administration, and Samples and logistics:**

Dr Rahul Batra MD<sup>12</sup>, Beth Blane BSc<sup>20</sup>, Dr Moira J Spyer PhD<sup>30,95,96</sup>, Perminder Smith MSc<sup>32,112</sup>, Mehmet Yavus<sup>85,109</sup>, Dr Rachel J Williams PhD<sup>96</sup>, Dr Adhyana IK Mahanama MD<sup>97</sup>, Dr Buddhini Samaraweera MD<sup>97</sup>, Sophia T Girgis MSc<sup>102</sup>, Samantha E Hansford CSci<sup>109</sup>, Dr Angie Green PhD<sup>115</sup>, Dr Charlotte Beaver PhD<sup>116</sup>, Katherine L Bellis<sup>116,102</sup>, Matthew J Dorman<sup>116</sup>, Sally Kay<sup>116</sup>, Liam Prestwood<sup>116</sup> and Dr Shavanthi Rajatileka PhD<sup>116</sup>

#### **Project administration, and Sequencing and analysis:**

Dr Joshua Quick PhD<sup>43</sup>

#### **Project administration, and Software and analysis tools:**

Radoslaw Poplawski BSc<sup>43</sup>

#### **Samples and logistics, and Sequencing and analysis:**

Dr Nicola Reynolds PhD<sup>8</sup>, Andrew Mack MPhil<sup>11</sup>, Dr Arthur Morriss PhD<sup>11</sup>, Thomas Whalley BSc<sup>11</sup>, Bindi Patel BSc<sup>12</sup>, Dr Iliana Georgana PhD<sup>24</sup>, Dr Myra Hosmillo PhD<sup>24</sup>, Malte L Pinckert MPhil<sup>24</sup>, Dr Joanne Stockton PhD<sup>43</sup>, Dr John H Henderson PhD<sup>65</sup>, Amy Hollis HND<sup>65</sup>, Dr William Stanley PhD<sup>65</sup>, Dr Wen C Yew PhD<sup>65</sup>, Dr Richard Myers PhD<sup>72</sup>, Dr Alicia Thornton PhD<sup>72</sup>, Alexander Adams BSc<sup>74</sup>, Tara Annett BSc<sup>74</sup>, Dr Hibo Asad PhD<sup>74</sup>, Alec Birchley MSc<sup>74</sup>, Jason Coombes BSc<sup>74</sup>, Johnathan M Evans MSc<sup>74</sup>, Laia Fina<sup>74</sup>, Bree Gatica-Wilcox MPhil<sup>74</sup>, Lauren Gilbert<sup>74</sup>, Lee Graham BSc<sup>74</sup>, Jessica Hey BSc<sup>74</sup>, Ember Hilvers MPH<sup>74</sup>, Sophie Jones MSc<sup>74</sup>, Hannah Jones<sup>74</sup>, Sara Kumziene-Summerhayes MSc<sup>74</sup>, Dr Caoimhe McKerr PhD<sup>74</sup>, Jessica Powell BSc<sup>74</sup>, Georgia Pugh<sup>74</sup>, Sarah Taylor<sup>74</sup>, Alexander J Trotter MRes<sup>75</sup>, Charlotte A Williams BSc<sup>96</sup>, Leanne M Kermack MSc<sup>102</sup>, Benjamin H Foulkes MSc<sup>109</sup>, Marta Gallis MSc<sup>109</sup>, Hailey R Hornsby MSc<sup>109</sup>, Stavroula F Louka MSc<sup>109</sup>, Dr Manoj Pohare PhD<sup>109</sup>, Paige Wolverson MSc<sup>109</sup>, Peijun Zhang MSc<sup>109</sup>, George MacIntyre-Cockett BSc<sup>115</sup>, Amy Trebes MSc<sup>115</sup>, Dr Robin J Moll PhD<sup>116</sup>, Lynne Ferguson MSc<sup>117</sup>, Dr Emily J Goldstein PhD<sup>117</sup>, Dr Alasdair Maclean PhD<sup>117</sup> and Dr Rachael Tomb PhD<sup>117</sup>

#### **Samples and logistics, and Software and analysis tools:**

Dr Igor Starinskij MSc, MRCP<sup>53</sup>

#### **Sequencing and analysis, and Software and analysis tools:**

Laura Thomson BSc<sup>5</sup>, Joel Southgate MSc<sup>11,74</sup>, Dr Moritz UG Kraemer DPhil<sup>23</sup>, Dr Jayna Raghvani PhD<sup>23</sup>, Dr Alex E Zarebski PhD<sup>23</sup>, Olivia Boyd MSc<sup>39</sup>, Lily Geidelberg MSc<sup>39</sup>, Dr Chris J Illingworth PhD

<sup>52</sup>, Dr Chris Jackson PhD <sup>52</sup>, Dr David Pascall PhD <sup>52</sup>, Dr Sreenu Vattipally PhD <sup>53</sup>, Timothy M Freeman MPhil <sup>109</sup>, Dr Sharon N Hsu PhD <sup>109</sup>, Dr Benjamin B Lindsey MRCP <sup>109</sup>, Dr Keith James PhD <sup>116</sup>, Kevin Lewis <sup>116</sup>, Gerry Tonkin-Hill <sup>116</sup> and Dr Jaime M Tovar-Corona PhD <sup>116</sup>

#### **Sequencing and analysis, and Visualisation:**

MacGregor Cox MSc <sup>20</sup>

#### **Software and analysis tools, and Visualisation:**

Dr Khalil Abudahab PhD <sup>14, 116</sup>, Mirko Menegazzo <sup>14</sup>, Ben EW Taylor MEng <sup>14, 116</sup>, Dr Corin A Yeats PhD <sup>14</sup>, Afrida Mukaddas BTech <sup>53</sup>, Derek W Wright MSc <sup>53</sup>, Dr Leonardo de Oliveira Martins PhD <sup>75</sup>, Dr Rachel Colquhoun DPhil <sup>104</sup>, Verity Hill <sup>104</sup>, Dr Ben Jackson PhD <sup>104</sup>, Dr JT McCrone PhD <sup>104</sup>, Dr Nathan Medd PhD <sup>104</sup>, Dr Emily Scher PhD <sup>104</sup> and Jon-Paul Keatley <sup>116</sup>

#### **Leadership and supervision:**

Dr Tanya Curran PhD <sup>3</sup>, Dr Sian Morgan FRCPATH <sup>10</sup>, Prof Patrick Maxwell PhD <sup>20</sup>, Prof Ken Smith PhD <sup>20</sup>, Dr Sahar Eldirdiri MBBS, MSc, FRCPATH <sup>21</sup>, Anita Kenyon MSc <sup>21</sup>, Prof Alison H Holmes MD <sup>38, 57</sup>, Dr James R Price PhD <sup>38, 57</sup>, Dr Tim Wyatt PhD <sup>69</sup>, Dr Alison E Mather PhD <sup>75</sup>, Dr Timofey Skvortsov PhD <sup>77</sup> and Prof John A Hartley PhD <sup>96</sup>

#### **Metadata curation:**

Prof Martyn Guest PhD <sup>11</sup>, Dr Christine Kitchen PhD <sup>11</sup>, Dr Ian Merrick PhD <sup>11</sup>, Robert Munn BSc <sup>11</sup>, Dr Beatrice Bertolusso Degree <sup>33</sup>, Dr Jessica Lynch MBCHB <sup>33</sup>, Dr Gabrielle Vernet MBBS <sup>33</sup>, Stuart Kirk MSc <sup>34</sup>, Dr Elizabeth Wastnedge MD <sup>56</sup>, Dr Rachael Stanley PhD <sup>58</sup>, Giles Idle <sup>64</sup>, Dr Declan T Bradley PhD <sup>69, 77</sup>, Dr Jennifer Poyner MD <sup>79</sup> and Matilde Mori BSc <sup>110</sup>

#### **Project administration:**

Owen Jones BSc <sup>11</sup>, Victoria Wright BSc <sup>18</sup>, Ellena Brooks MA <sup>20</sup>, Carol M Churcher BSc <sup>20</sup>, Mireille Fragakis HND <sup>20</sup>, Dr Katerina Galai PhD <sup>20, 70</sup>, Dr Andrew Jermy PhD <sup>20</sup>, Sarah Judges BA <sup>20</sup>, Georgina M McManus BSc <sup>20</sup>, Kim S Smith <sup>20</sup>, Dr Elaine Westwick PhD <sup>20</sup>, Dr Stephen W Attwood PhD <sup>23</sup>, Dr Frances Bolt PhD <sup>38, 57</sup>, Dr Alisha Davies PhD <sup>74</sup>, Elen De Lacy MPH <sup>74</sup>, Fatima Downing <sup>74</sup>, Sue Edwards <sup>74</sup>, Lizzie Meadows MA <sup>75</sup>, Sarah Jeremiah MSc <sup>97</sup>, Dr Nikki Smith PhD <sup>109</sup> and Luke Foulser <sup>116</sup>

#### **Samples and logistics:**

Dr Themoula Charalampous PhD <sup>12, 46</sup>, Amita Patel BSc <sup>12</sup>, Dr Louise Berry PhD <sup>15</sup>, Dr Tim Boswell PhD <sup>15</sup>, Dr Vicki M Fleming PhD <sup>15</sup>, Dr Hannah C Howson-Wells PhD <sup>15</sup>, Dr Amelia Joseph PhD <sup>15</sup>, Manjinder Khakh <sup>15</sup>, Dr Michelle M Lister PhD <sup>15</sup>, Paul W Bird MSc, MRes <sup>16</sup>, Karlie Fallon <sup>16</sup>, Thomas Helmer <sup>16</sup>, Dr Claire L McMurray PhD <sup>16</sup>, Mina Odedra BSc <sup>16</sup>, Jessica Shaw BSc <sup>16</sup>, Dr Julian W Tang PhD <sup>16</sup>, Nicholas J Willford MSc <sup>16</sup>, Victoria Blakey BSc <sup>17</sup>, Dr Veena Raviprakash MD <sup>17</sup>, Nicola Sheriff BSc <sup>17</sup>, Lesley-Anne Williams BSc <sup>17</sup>, Theresa Feltwell MSc <sup>20</sup>, Dr Luke Bedford PhD <sup>26</sup>, Dr James S Cargill PhD <sup>27</sup>, Warwick Hughes MSc <sup>27</sup>, Dr Jonathan Moore MD <sup>28</sup>, Susanne Stonehouse BSc <sup>28</sup>, Laura Atkinson MSc <sup>29</sup>, Jack CD Lee MSc <sup>29</sup>, Dr Divya Shah PhD <sup>29</sup>, Adela Alcolea-Medina Clinical scientist <sup>32, 112</sup>, Natasha Ohemeng-Kumi MSc <sup>32, 112</sup>, John Ramble MSc <sup>32, 112</sup>, Jasveen Sehmi MSc <sup>32, 112</sup>, Dr Rebecca Williams BMBS <sup>33</sup>, Wendy Chatterton MSc <sup>34</sup>, Monika Pusok MSc <sup>34</sup>, William Everson MSc <sup>37</sup>, Anibolina Castigador IBMS HCPC <sup>44</sup>, Emily Macnaughton FRCPATH <sup>44</sup>, Dr Kate El Bouzidi MRCP <sup>45</sup>, Dr Temi Lampejo FRCPATH <sup>45</sup>, Dr Malur Sudhanva FRCPATH <sup>45</sup>, Cassie Breen BSc <sup>47</sup>, Dr Graciela Sluga MD, MSc <sup>48</sup>, Dr Shazaad SY Ahmad MSc <sup>49, 70</sup>, Dr Ryan P George PhD <sup>49</sup>, Dr Nicholas W Machin MSc <sup>49, 70</sup>, Debbie Binns BSc <sup>50</sup>, Victoria James BSc <sup>50</sup>, Dr Rachel Blacow MBCHB <sup>55</sup>, Dr Lindsay Coupland PhD <sup>58</sup>, Dr Louise Smith PhD <sup>59</sup>, Dr Edward Barton MD <sup>60</sup>, Debra Padgett BSc <sup>60</sup>, Garren Scott BSc <sup>60</sup>, Dr Aidan Cross MBCHB <sup>61</sup>, Dr Mariyam Mirfenderesky FRCPATH <sup>61</sup>, Jane Greenaway MSc <sup>62</sup>, Kevin Cole <sup>64</sup>, Phillip Clarke <sup>67</sup>, Nichola Duckworth <sup>67</sup>, Sarah Walsh <sup>67</sup>, Kelly Bicknell <sup>68</sup>, Robert Impey MSc <sup>68</sup>, Dr Sarah Wyllie PhD <sup>68</sup>, Richard Hopes <sup>70</sup>, Dr Chloe Bishop PhD <sup>72</sup>, Dr Vicki Chalker PhD <sup>72</sup>, Dr Ian Harrison PhD <sup>72</sup>, Laura Gifford MSc <sup>74</sup>, Dr Zoltan Molnar PhD <sup>77</sup>, Dr Cressida Auckland FRCPATH <sup>79</sup>, Dr Cariad Evans PhD <sup>85, 109</sup>, Dr Kate Johnson

PhD<sup>85,109</sup>, Dr David G Partridge FRCP, FRCPath<sup>85,109</sup>, Dr Mohammad Raza PhD<sup>85,109</sup>, Paul Baker MD<sup>86</sup>, Prof Stephen Bonner PhD<sup>86</sup>, Sarah Essex<sup>86</sup>, Leanne J Murray<sup>86</sup>, Andrew I Lawton MSc<sup>87</sup>, Dr Shirelle Burton-Fanning MD<sup>89</sup>, Dr Brendan Al Payne MD<sup>89</sup>, Dr Sheila Waugh MD<sup>89</sup>, Andrea N Gomes MSc<sup>91</sup>, Maimuna Kimuli MSc<sup>91</sup>, Darren R Murray MSc<sup>91</sup>, Paula Ashfield MSc<sup>92</sup>, Dr Donald Dobie MBCHB<sup>92</sup>, Dr Fiona Ashford PhD<sup>93</sup>, Dr Angus Best PhD<sup>93</sup>, Dr Liam Crawford PhD<sup>93</sup>, Dr Nicola Cumley PhD<sup>93</sup>, Dr Megan Mayhew PhD<sup>93</sup>, Dr Oliver Megram PhD<sup>93</sup>, Dr Jeremy Mirza PhD<sup>93</sup>, Dr Emma Moles-Garcia PhD<sup>93</sup>, Dr Benita Percival PhD<sup>93</sup>, Megan Driscoll BSc<sup>96</sup>, Leah Ensell BSc<sup>96</sup>, Dr Helen L Lowe PhD<sup>96</sup>, Laurentiu Maftei BSc<sup>96</sup>, Matteo Mondani MSc<sup>96</sup>, Nicola J Chaloner BSc<sup>99</sup>, Benjamin J Cogger BSc<sup>99</sup>, Lisa J Easton MSc<sup>99</sup>, Hannah Huckson BSc<sup>99</sup>, Jonathan Lewis MSc, PgD, FIBMS<sup>99</sup>, Sarah Lowdon BSc<sup>99</sup>, Cassandra S Malone MSc<sup>99</sup>, Florence Munemo BSc<sup>99</sup>, Manasa Mutingwende MSc<sup>99</sup>, Roberto Nicodemi BSc<sup>99</sup>, Olga Podplomyk FD<sup>99</sup>, Thomas Somassa BSc<sup>99</sup>, Dr Andrew Beggs PhD<sup>100</sup>, Dr Alex Richter PhD<sup>100</sup>, Claire Cormie<sup>102</sup>, Joana Dias MSc<sup>102</sup>, Sally Forrest BSc<sup>102</sup>, Dr Ellen E Higginson PhD<sup>102</sup>, Mailis Maes MPhil<sup>102</sup>, Jamie Young BSc<sup>102</sup>, Dr Rose K Davidson PhD<sup>103</sup>, Kathryn A Jackson MSc<sup>107</sup>, Dr Lance Turtle PhD, MRCP<sup>107</sup>, Dr Alexander J Keeley MRCP<sup>109</sup>, Prof Jonathan Ball PhD<sup>113</sup>, Timothy Byaruhanga MSc<sup>113</sup>, Dr Joseph G Chappell PhD<sup>113</sup>, Jayasree Dey MSc<sup>113</sup>, Jack D Hill MSc<sup>113</sup>, Emily J Park MSc<sup>113</sup>, Arezou Fanaie MSc<sup>114</sup>, Rachel A Hilson MSc<sup>114</sup>, Geraldine Yaze MSc<sup>114</sup> and Stephanie Lo<sup>116</sup>

### Sequencing and analysis:

Safiah Afifi BSc<sup>10</sup>, Robert Beer BSc<sup>10</sup>, Joshua Maksimovic FD<sup>10</sup>, Kathryn McCluggage Masters<sup>10</sup>, Karla Spellman FD<sup>10</sup>, Catherine Bresner BSc<sup>11</sup>, William Fuller BSc<sup>11</sup>, Dr Angela Marchbank BSc<sup>11</sup>, Trudy Workman HNC<sup>11</sup>, Dr Ekaterina Shelest PhD<sup>13,81</sup>, Dr Johnny Debebe PhD<sup>18</sup>, Dr Fei Sang PhD<sup>18</sup>, Dr Marina Escalera Zamudio PhD<sup>23</sup>, Dr Sarah Francois PhD<sup>23</sup>, Bernardo Gutierrez MSc<sup>23</sup>, Dr Tetyana I Vasylieva DPhil<sup>23</sup>, Dr Flavia Flaviani PhD<sup>31</sup>, Dr Manon Ragonnet-Cronin PhD<sup>39</sup>, Dr Katherine L Smollett PhD<sup>42</sup>, Alice Broos BSc<sup>53</sup>, Daniel Mair BSc<sup>53</sup>, Jenna Nichols BSc<sup>53</sup>, Dr Kyriaki Nomikou PhD<sup>53</sup>, Dr Lily Tong PhD<sup>53</sup>, Ioulia Tsatsani MSc<sup>53</sup>, Prof Sarah O'Brien PhD<sup>54</sup>, Prof Steven Rushton PhD<sup>54</sup>, Dr Roy Sanderson PhD<sup>54</sup>, Dr Jon Perkins MBCHB<sup>55</sup>, Seb Cotton MSc<sup>56</sup>, Abbie Gallagher BSc<sup>56</sup>, Dr Elias Allara MD, PhD<sup>70,102</sup>, Clare Pearson MSc<sup>70,102</sup>, Dr David Bibby PhD<sup>72</sup>, Dr Gavin Dabrera PhD<sup>72</sup>, Dr Nicholas Ellaby PhD<sup>72</sup>, Dr Eileen Gallagher PhD<sup>72</sup>, Dr Jonathan Hubb PhD<sup>72</sup>, Dr Angie Lackenby PhD<sup>72</sup>, Dr David Lee PhD<sup>72</sup>, Nikos Manesis<sup>72</sup>, Dr Tamyo Mbisa PhD<sup>72</sup>, Dr Steven Platt PhD<sup>72</sup>, Katherine A Twohig<sup>72</sup>, Dr Mari Morgan PhD<sup>74</sup>, Alp Aydin MSci<sup>75</sup>, David J Baker BEng<sup>75</sup>, Dr Ebenezer Foster-Nyarko PhD<sup>75</sup>, Dr Sophie J Prosolek PhD<sup>75</sup>, Steven Rudder<sup>75</sup>, Chris Baxter BSc<sup>77</sup>, Sílvia F Carvalho MSc<sup>77</sup>, Dr Deborah Lavin PhD<sup>77</sup>, Dr Arun Mariappan PhD<sup>77</sup>, Dr Clara Radulescu PhD<sup>77</sup>, Dr Aditi Singh PhD<sup>77</sup>, Miao Tang MD<sup>77</sup>, Helen Morcrette BSc<sup>79</sup>, Nadua Bayzid BSc<sup>96</sup>, Marius Cotic MSc<sup>96</sup>, Dr Carlos E Balcazar PhD<sup>104</sup>, Dr Michael D Gallagher PhD<sup>104</sup>, Dr Daniel Maloney PhD<sup>104</sup>, Thomas D Stanton BSc<sup>104</sup>, Dr Kathleen A Williamson PhD<sup>104</sup>, Dr Robin Manley PhD<sup>105</sup>, Michelle L Michelsen BSc<sup>105</sup>, Dr Christine M Sambles PhD<sup>105</sup>, Dr David J Studholme PhD<sup>105</sup>, Joanna Warwick-Dugdale BSc<sup>105</sup>, Richard Eccles MSc<sup>107</sup>, Matthew Gemmell MSc<sup>107</sup>, Dr Richard Gregory PhD<sup>107</sup>, Dr Margaret Hughes PhD<sup>107</sup>, Charlotte Nelson MSc<sup>107</sup>, Dr Lucille Rainbow PhD<sup>107</sup>, Dr Edith E Vamos PhD<sup>107</sup>, Hermione J Webster BSc<sup>107</sup>, Dr Mark Whitehead PhD<sup>107</sup>, Claudia Wierzbicki BSc<sup>107</sup>, Dr Adrienn Angyal PhD<sup>109</sup>, Dr Luke R Green PhD<sup>109</sup>, Dr Max Whiteley PhD<sup>109</sup>, Emma Betteridge BSc<sup>116</sup>, Dr Iraad F Bronner PhD<sup>116</sup>, Ben W Farr BSc<sup>116</sup>, Scott Goodwin MSc<sup>116</sup>, Dr Stefanie V Lensing PhD<sup>116</sup>, Shane A McCarthy<sup>116,102</sup>, Dr Michael A Quail PhD<sup>116</sup>, Diana Rajan MSc<sup>116</sup>, Dr Nicholas M Redshaw PhD<sup>116</sup>, Carol Scott<sup>116</sup>, Lesley Shirley MSc<sup>116</sup> and Scott AJ Thurston BSc<sup>116</sup>

### Software and analysis tools:

Dr Will Rowe PhD<sup>43</sup>, Amy Gaskin MSc<sup>74</sup>, Dr Thanh Le-Viet PhD<sup>75</sup>, James Bonfield BSc<sup>116</sup>, Jennifer Liddle<sup>116</sup> and Andrew Whitwham BSc<sup>116</sup>

**1** Barking, Havering and Redbridge University Hospitals NHS Trust, **2** Barts Health NHS Trust, **3** Belfast Health & Social Care Trust, **4** Betsi Cadwaladr University Health Board, **5** Big Data Institute, Nuffield Department of Medicine, University of Oxford, **6** Blackpool Teaching Hospitals NHS Foundation Trust, **7** Bournemouth University, **8** Cambridge Stem Cell Institute, University of Cambridge, **9** Cambridge University Hospitals NHS



Foundation Trust, **10** Cardiff and Vale University Health Board, **11** Cardiff University, **12** Centre for Clinical Infection and Diagnostics Research, Department of Infectious Diseases, Guy's and St Thomas' NHS Foundation Trust, **13** Centre for Enzyme Innovation, University of Portsmouth, **14** Centre for Genomic Pathogen Surveillance, University of Oxford, **15** Clinical Microbiology Department, Queens Medical Centre, Nottingham University Hospitals NHS Trust, **16** Clinical Microbiology, University Hospitals of Leicester NHS Trust, **17** County Durham and Darlington NHS Foundation Trust, **18** Deep Seq, School of Life Sciences, Queens Medical Centre, University of Nottingham, **19** Department of Infectious Diseases and Microbiology, Cambridge University Hospitals NHS Foundation Trust, **20** Department of Medicine, University of Cambridge, **21** Department of Microbiology, Kettering General Hospital, **22** Department of Microbiology, South West London Pathology, **23** Department of Zoology, University of Oxford, **24** Division of Virology, Department of Pathology, University of Cambridge, **25** East Kent Hospitals University NHS Foundation Trust, **26** East Suffolk and North Essex NHS Foundation Trust, **27** East Sussex Healthcare NHS Trust, **28** Gateshead Health NHS Foundation Trust, **29** Great Ormond Street Hospital for Children NHS Foundation Trust, **30** Great Ormond Street Institute of Child Health (GOS ICH), University College London (UCL), **31** Guy's and St. Thomas' Biomedical Research Centre, **32** Guy's and St. Thomas' NHS Foundation Trust, **33** Hampshire Hospitals NHS Foundation Trust, **34** Health Services Laboratories, **35** Heartlands Hospital, Birmingham, **36** Hub for Biotechnology in the Built Environment, Northumbria University, **37** Hull University Teaching Hospitals NHS Trust, **38** Imperial College Healthcare NHS Trust, **39** Imperial College London, **40** Infection Care Group, St George's University Hospitals NHS Foundation Trust, **41** Institute for Infection and Immunity, St George's University of London, **42** Institute of Biodiversity, Animal Health & Comparative Medicine, **43** Institute of Microbiology and Infection, University of Birmingham, **44** Isle of Wight NHS Trust, **45** King's College Hospital NHS Foundation Trust, **46** King's College London, **47** Liverpool Clinical Laboratories, **48** Maidstone and Tunbridge Wells NHS Trust, **49** Manchester University NHS Foundation Trust, **50** Microbiology Department, Buckinghamshire Healthcare NHS Trust, **51** Microbiology, Royal Oldham Hospital, **52** MRC Biostatistics Unit, University of Cambridge, **53** MRC-University of Glasgow Centre for Virus Research, **54** Newcastle University, **55** NHS Greater Glasgow and Clyde, **56** NHS Lothian, **57** NIHR Health Protection Research Unit in HCAI and AMR, Imperial College London, **58** Norfolk and Norwich University Hospitals NHS Foundation Trust, **59** Norfolk County Council, **60** North Cumbria Integrated Care NHS Foundation Trust, **61** North Middlesex University Hospital NHS Trust, **62** North Tees and Hartlepool NHS Foundation Trust, **63** North West London Pathology, **64** Northumbria Healthcare NHS Foundation Trust, **65** Northumbria University, **66** NU-OMICS, Northumbria University, **67** Path Links, Northern Lincolnshire and Goole NHS Foundation Trust, **68** Portsmouth Hospitals University NHS Trust, **69** Public Health Agency, Northern Ireland, **70** Public Health England, **71** Public Health England, Cambridge, **72** Public Health England, Colindale, **73** Public Health Scotland, **74** Public Health Wales, **75** Quadram Institute Bioscience, **76** Queen Elizabeth Hospital, Birmingham, **77** Queen's University Belfast, **78** Royal Brompton and Harefield Hospitals, **79** Royal Devon and Exeter NHS Foundation Trust, **80** Royal Free London NHS Foundation Trust, **81** School of Biological Sciences, University of Portsmouth, **82** School of Health Sciences, University of Southampton, **83** School of Medicine, University of Southampton, **84** School of Pharmacy & Biomedical Sciences, University of Portsmouth, **85** Sheffield Teaching Hospitals NHS Foundation Trust, **86** South Tees Hospitals NHS Foundation Trust, **87** Southwest Pathology Services, **88** Swansea University, **89** The Newcastle upon Tyne Hospitals NHS Foundation Trust, **90** The Queen Elizabeth Hospital King's Lynn NHS Foundation Trust, **91** The Royal Marsden NHS Foundation Trust, **92** The Royal Wolverhampton NHS Trust, **93** Turnkey Laboratory, University of Birmingham, **94** University College London Division of Infection and Immunity, **95** University College London Hospital Advanced Pathogen Diagnostics Unit, **96** University College London Hospitals NHS Foundation Trust, **97** University Hospital Southampton NHS Foundation Trust, **98** University Hospitals Dorset NHS Foundation Trust, **99** University Hospitals Sussex NHS Foundation Trust, **100** University of Birmingham, **101** University of Brighton, **102** University of Cambridge, **103** University of East Anglia, **104** University of Edinburgh, **105** University of Exeter, **106** University of Kent, **107** University of Liverpool, **108** University of Oxford, **109** University of Sheffield, **110** University of Southampton, **111** University of St Andrews, **112** Viapath, Guy's and St Thomas' NHS Foundation Trust, and King's College Hospital NHS Foundation Trust, **113** Virology, School of Life Sciences, Queens Medical Centre, University of Nottingham, **114** Watford General Hospital, **115** Wellcome Centre for Human Genetics, Nuffield Department of Medicine, University of Oxford, **116** Wellcome Sanger Institute, **117** West of Scotland Specialist Virology Centre, NHS Greater Glasgow and Clyde, **118** Whittington Health NHS Trust
